# Supplementary material
Source: PubMed Central journal article supplement (PMC4536133)

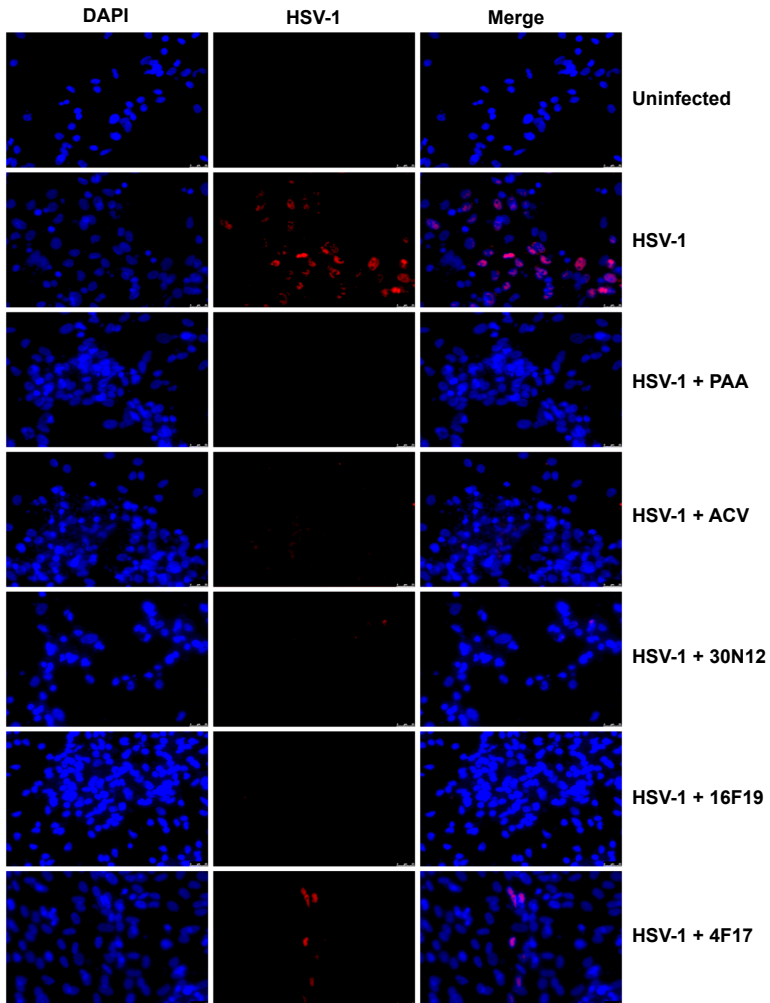

**Supplementary Figure S1**

Supplement: NIHMS705689-supplement-1.pdf [file NIHMS705689-supplement-1.pdf]

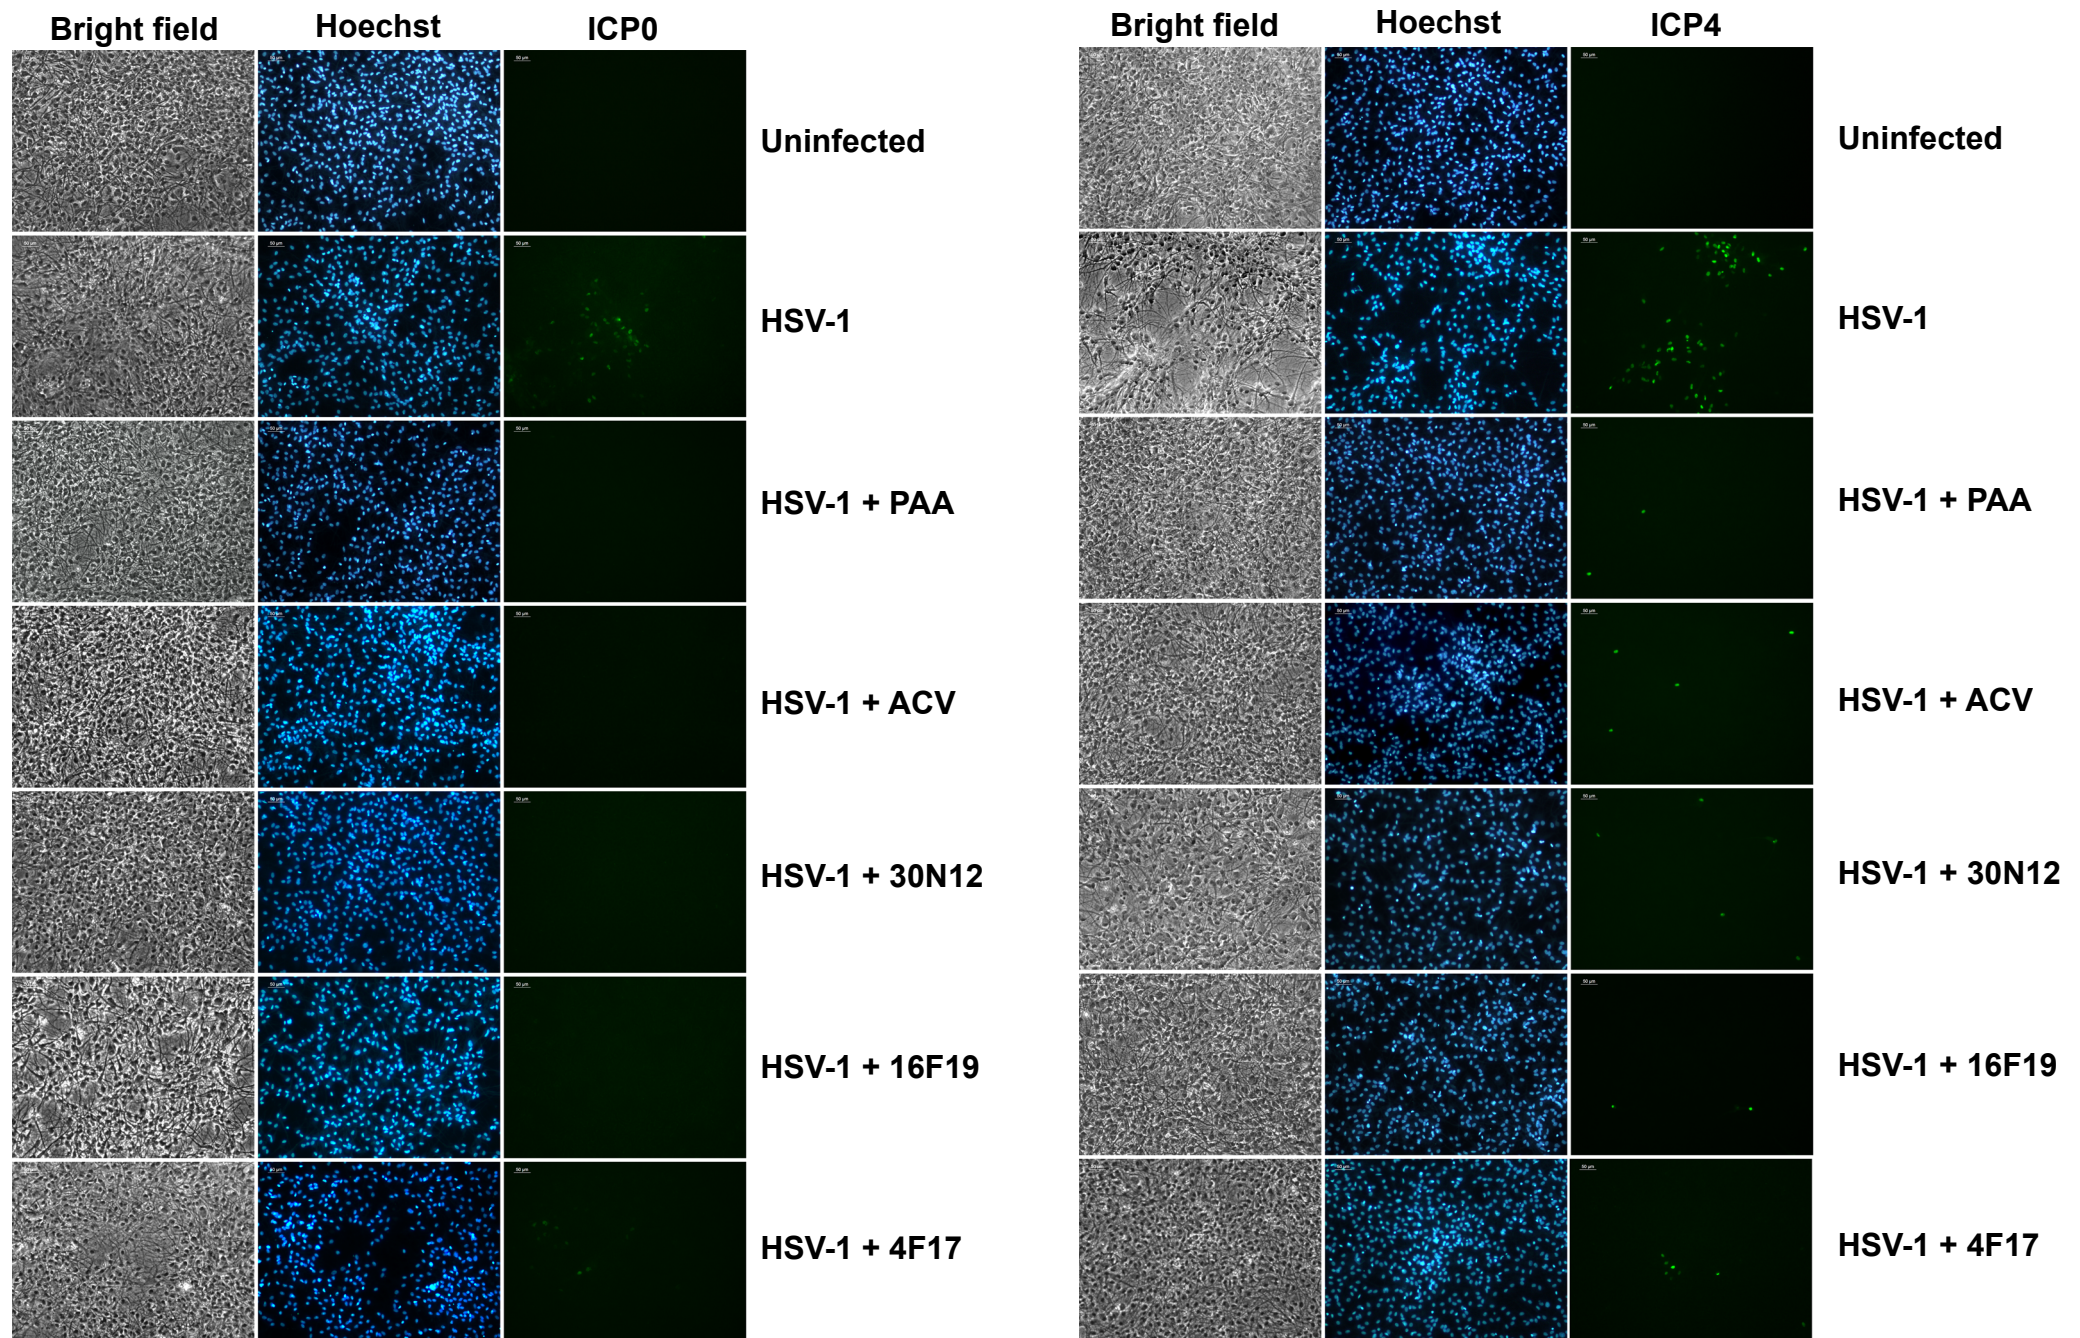

**Supplementary Figure S2**

Supplement: NIHMS705689-supplement-2.pdf [file NIHMS705689-supplement-2.pdf]

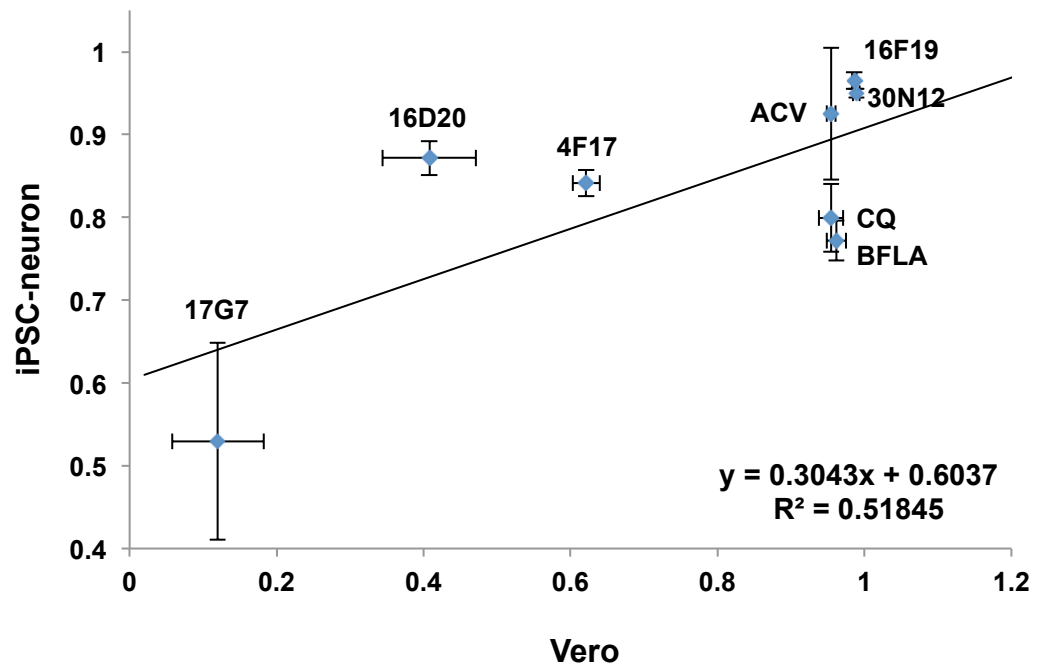

Supplemental Figure S3

Supplement: NIHMS705689-supplement-3.pdf [file NIHMS705689-supplement-3.pdf]

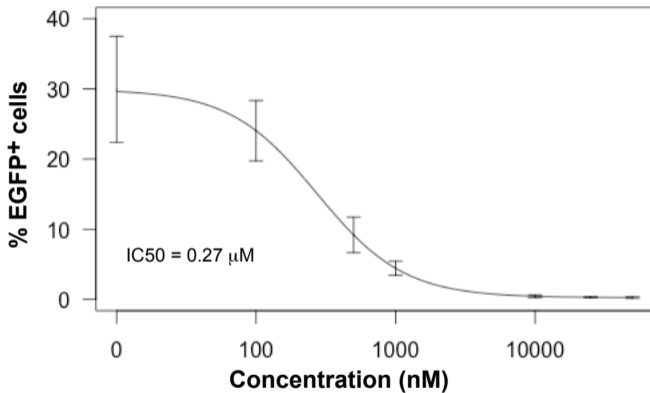

**Supplemental Figure S4**

Supplement: NIHMS705689-supplement-4.pdf [file NIHMS705689-supplement-4.pdf]

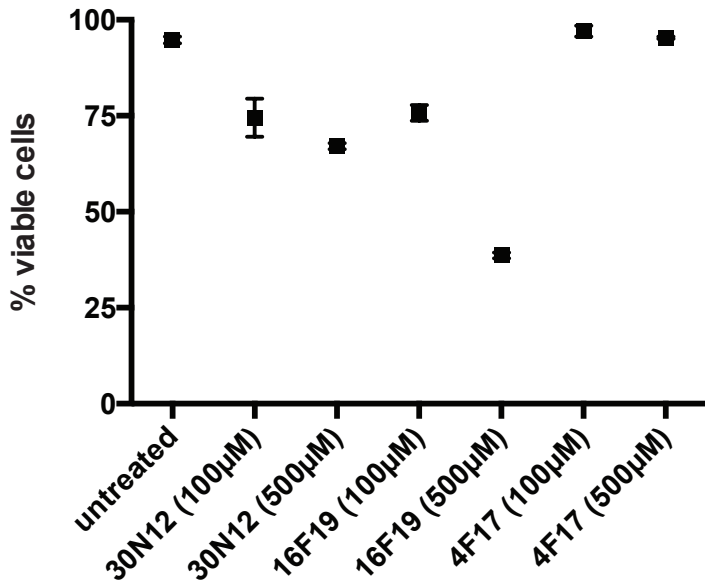

Supplemental Figure S5

Supplement: NIHMS705689-supplement-5.pdf [file NIHMS705689-supplement-5.pdf]

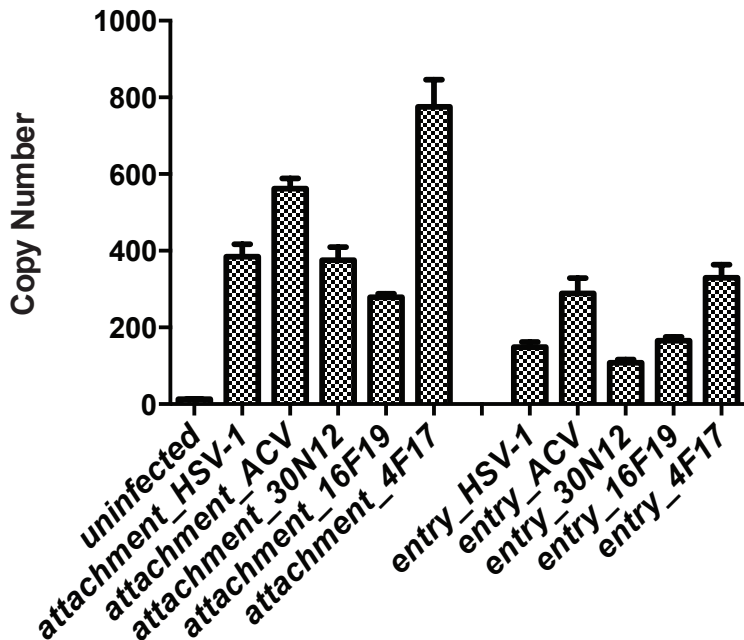

Supplemental Figure S6

Supplement: NIHMS705689-supplement-6.pdf [file NIHMS705689-supplement-6.pdf]
